# Supplementary material
Source: PubMed Central journal article supplement (PMC4358630)
Supplement: nn406258m_si_001.pdf [file nn406258m_si_001.pdf]

Supporting Information for

**Radioactive  $^{198}\text{Au}$ -Doped Nanostructures with Different Shapes for  
*in vivo* Analyses of Their Biodistribution, Tumor Uptake, and  
Intratumoral Distribution**

Kvar C. L. Black,<sup>†,⊥</sup> Yucai Wang,<sup>‡,⊥</sup> Hannah P. Luehmann,<sup>†</sup> Xin Cai,<sup>€</sup> Wenxin Xing,<sup>€</sup> Bo Pang,<sup>‡</sup>  
Yongfeng Zhao,<sup>†</sup> Cathy S. Cutler,<sup>§</sup> Lihong V. Wang,<sup>€</sup> Yongjian Liu,<sup>†,\*</sup> and Younan Xia<sup>‡,\*</sup>

<sup>†</sup>Mallinckrodt Institute of Radiology, Washington University School of Medicine, St. Louis,  
Missouri 63110, United States

<sup>‡</sup>The Wallace H. Coulter Department of Biomedical Engineering, Georgia Institute of  
Technology and Emory University, Atlanta, Georgia 30332, United States

<sup>€</sup>Department of Biomedical Engineering, Washington University, St. Louis, Missouri 63130,  
United States

<sup>§</sup>University of Missouri Research Reactor, Columbia, Missouri 65211, United States

<sup>⊥</sup>These two authors contribute equally to this work

\*Address correspondence to younan.xia@bme.gatech.edu; liuyo@mir.wustl.edu

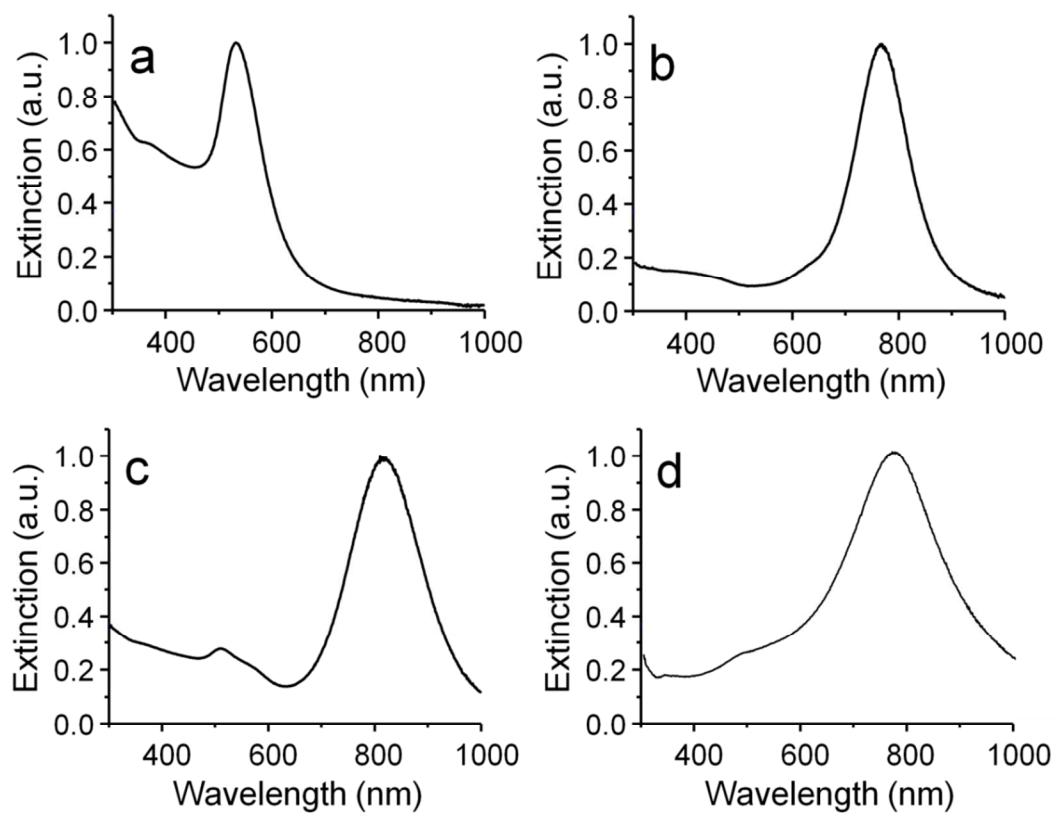

**Figure S1.** UV-vis-NIR extinction spectra of the four different types of Au nanostructures: (a) nanospheres, (b) nanodisks, (c) nanorods, (d) cubic nanocages.

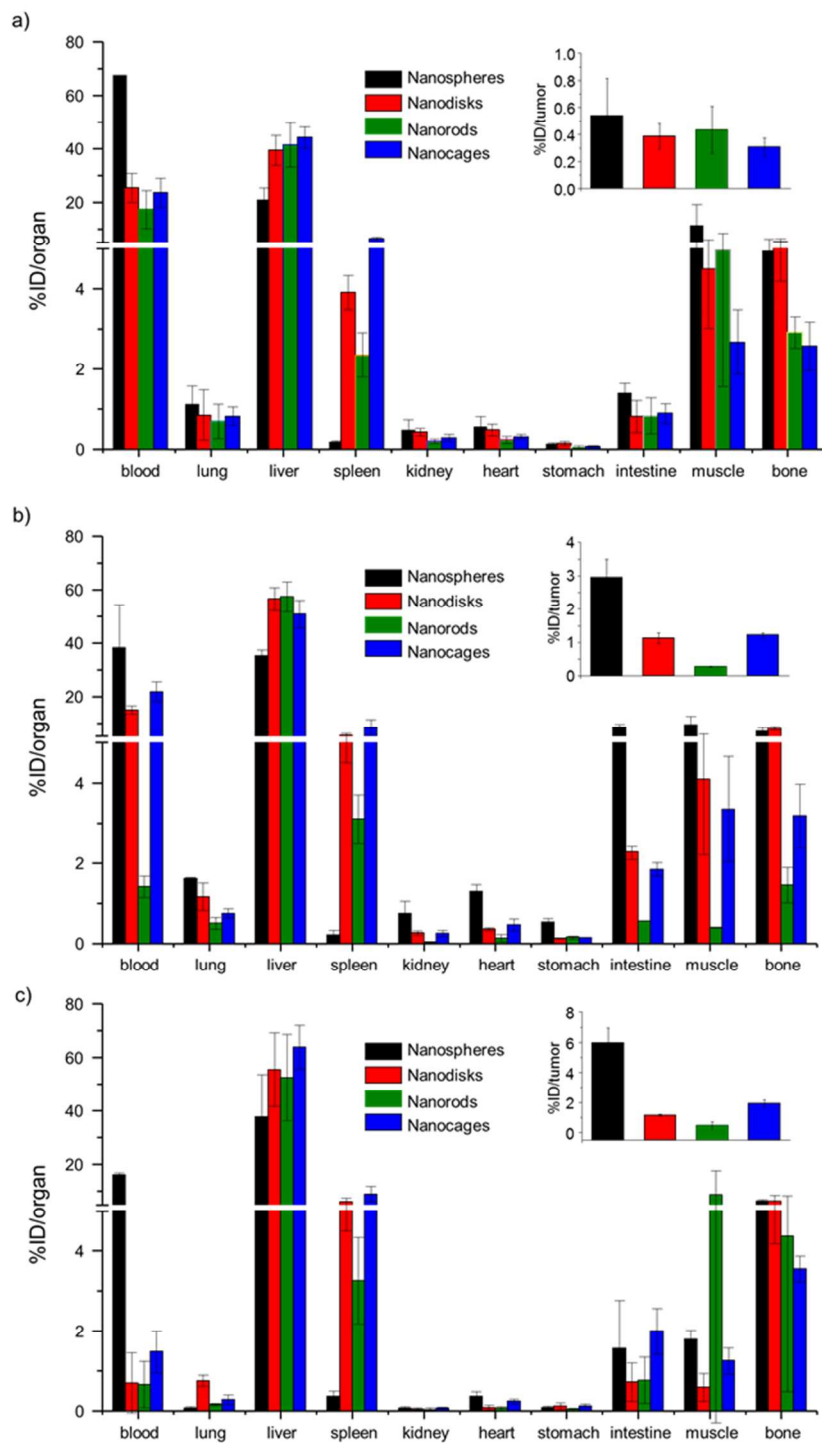

**Figure S2.** Biodistribution of the different types of  $^{198}\text{Au}$ -incorporated Au nanostructures at (a) 1 h, (b) 6 h, and (c) 24 h post injection. The data was presented as %ID/organ.

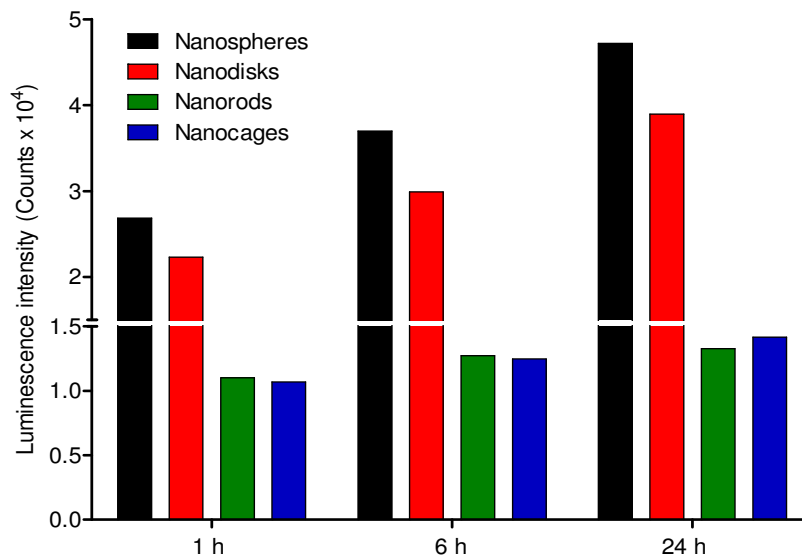

**Figure S3.** A quantitative comparison of the intensities of Cerenkov luminescence integrated from the whole tumor regions after the injection of <sup>198</sup>Au-incorporated Au nanospheres, nanodisks, nanorods, and cubic nanocages.

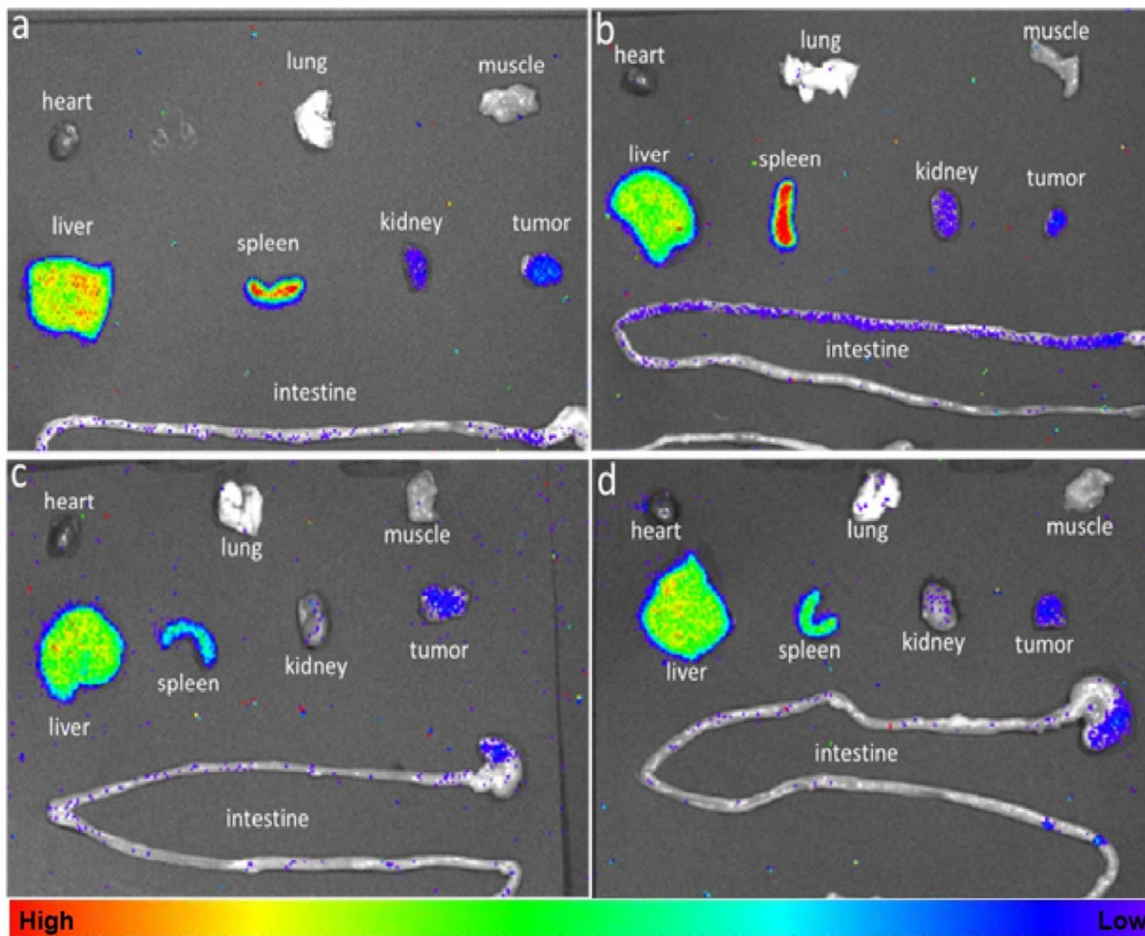

**Figure S4.** Cerenkov luminescence images of the organs that were harvested 24 h post injection of the  $^{198}\text{Au}$ -incorporated (a) nanospheres, (b) nanodisks, (c) nanorods, and (d) cubic nanocages. The luminescence images were merged with photographs taken using an ordinary camera.

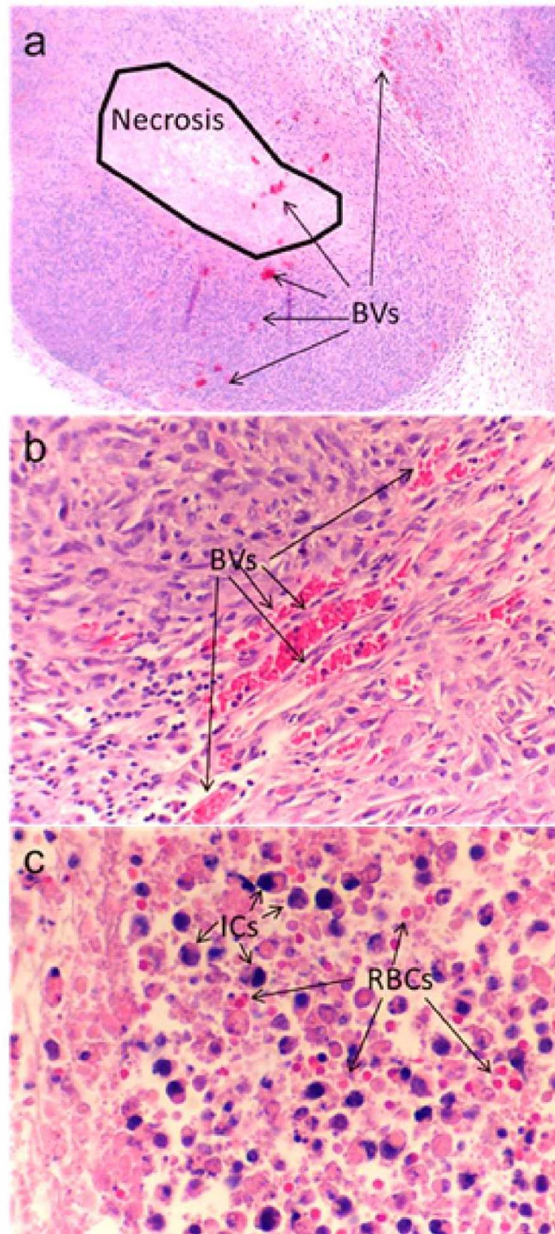

**Figure S5.** Histology of the EMT6 tumor after staining with hematoxylin and eosin (H&E). The samples show blood vessels (BVs), individual red blood cells (RBCs) from the leaky vasculature, inflammatory cells (ICs), and necrotic regions.

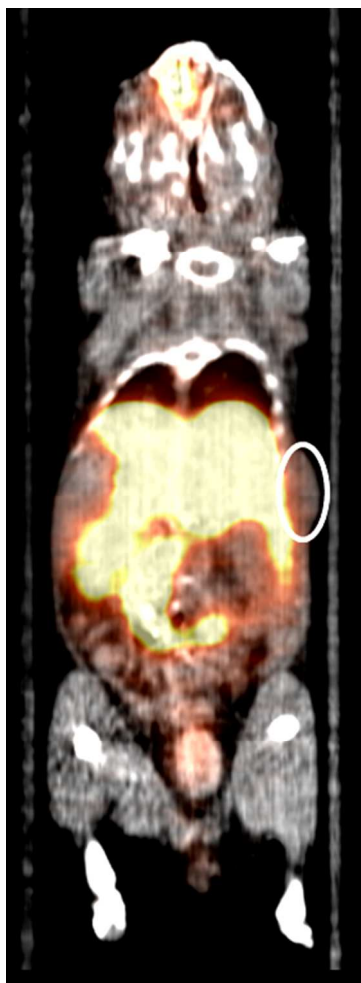

**Figure S6.** PET/CT image of a mouse bearing a EMT6 tumor (marked by the elliptic circle) after the injection of  $^{64}\text{Cu}$ -ATSM.

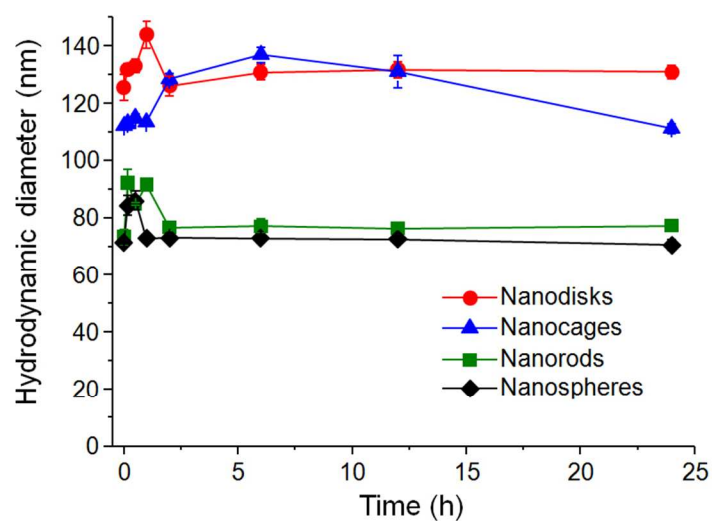

**Figure S7.** Plots of the hydrodynamic diameter of PEGylated nanostructures as a function of the incubation time. The PEGylated nanostructures were incubated with 10% Fetal Bovine Serum (FBS) in PBS at 37 °C for different periods of time. The hydrodynamic diameter was measured using dynamic light scattering.



**Table S1.** A summary of physical parameters for the Au nanostructures used in this study.

| <b>Nanostructures</b> | <b>Size (nm)</b>                           | <b>Surface area (nm<sup>2</sup>)</b> | <b><sup>198</sup>Au radiolabeling specific activity (mCi/mg)</b> |
|-----------------------|--------------------------------------------|--------------------------------------|------------------------------------------------------------------|
| <b>Nanosphere</b>     | diameter = 56.8                            | 10130                                | 1.6                                                              |
| <b>Nanodisk</b>       | diameter = 92<br>thickness = 7             | 13577                                | 0.18                                                             |
| <b>Nanorod</b>        | length = 39.2<br>diameter = 9.1            | 1975                                 | 2.1                                                              |
| <b>Nanocage</b>       | edge length = 49.6<br>wall thickness = 4.5 | 14760                                | 0.34                                                             |
